# Supplementary material for: Injury triggers fascia fibroblast collective cell migration to drive scar formation through N-cadherin
Source: PubMed Central journal article supplement (PMC7648088; doi:10.1038/s41467-020-19425-1), 2020-11-06
Supplement: 41467_2020_19425_MOESM2_ESM.pdf [file 41467_2020_19425_MOESM2_ESM.pdf]

**Title: Supplementary Movie 1.**

**Description:** Intravital live imaging of in vivo wound at 14-dpi on the back of *En1<sup>Cre</sup>;R26<sup>mTmG</sup>* mice.

**Title: Supplementary Movie 2.**

**Description:** GFP channel (EPFs) in every 10 frames from the intravital live imaging (Supplementary Movie 1). Purple dash lines indicate the predicted cellular orientation of EPFs.

**Title: Supplementary Movie 3.**

**Description:** Live imaging of SCAD chimera assay from 0 h to 16 h.

**Title: Supplementary Movie 4.**

**Description:** Live imaging of *En1<sup>Cre</sup>;R26<sup>mTmG</sup>* SCAD from 72 h to 96 h.

**Title: Supplementary Movie 5.**

**Description:** Live imaging of mCherry nuclear reporter (*En1<sup>Cre</sup>;R26<sup>LSL-H2B-mCherry</sup>*) SCAD from 72 h to 96 h.

**Title: Supplementary Movie 6.**

**Description:** Migratory tracks of EPFs in live imaging of *En1<sup>Cre</sup>;R26<sup>LSL-H2B-mCherry</sup>* SCAD from 72 h to 96 h. The colour indicates the time, with blue at the beginning and red at the end of the movie.

**Title: Supplementary Movie 7.**

**Description:** Live imaging of mCherry nuclear reporter (*Wnt1<sup>Cre</sup>;R26<sup>LSL-H2B-mCherry</sup>*) oral SCAD from 72 h to 96 h.

**Title: Supplementary Movie 8.**

**Description:** Migratory tracks of WPFs in live imaging of *Wnt1<sup>Cre</sup>;R26<sup>LSL-H2B-mCherry</sup>* oral SCAD from 72 h to 96 h. The colour indicates the time, with blue at the beginning and red at the end of the movie.

**Title: Supplementary Movie 9.**

**Description:** Live imaging of two-colour membrane reporter (*Wnt1<sup>Cre</sup>;R26<sup>mTmG</sup>*) oral SCAD from 72 h to 96 h.

**Title: Supplementary Movie 10.**

**Description:** 3D reconstruction of 500 µg/ml Exherin treated d4  $En1^{Cre};R26^{mTmG}$  SCAD with immunolabelling of Collagen I (magenta). EPFs are showed in GFP channel.

**Title: Supplementary Movie 11.**

**Description:** Live imaging of 500 µg/ml Exherin treated  $En1^{Cre};R26^{LSL-H2B-mCherry}$  SCAD from 72 h to 96 h.

**Title: Supplementary Movie 12.**

**Description:** 3D reconstruction of a punch biopsy of hypertrophic scar from human breast skin with immunolabelling of N-cadherin (magenta). Second harmonic generation signal is showed in cyan.

**Title: Supplementary Data 1.**

**Description:** Mass spectrometry dataset of proteins from day-0 and day-5 SCAD, *in vivo* scar, and adjacent skin.
